# Supplementary material for: Ammonium-to-sodium ion-exchange process at the interlayer of octacalcium phosphate
Source: Royal Society of Chemistry journal article supplement (doi:10.1039/d1ra07939e), 2021-01-01
Supplement: d1ra07939e1.pdf [file d1ra07939e1.pdf]

Supporting Information: Ammonium-to-sodium ion-exchange process at the  
interlayer of octacalcium phosphate

Yuki Sugiura, Yoji Makita, and Masanori Horie

Figure S1.

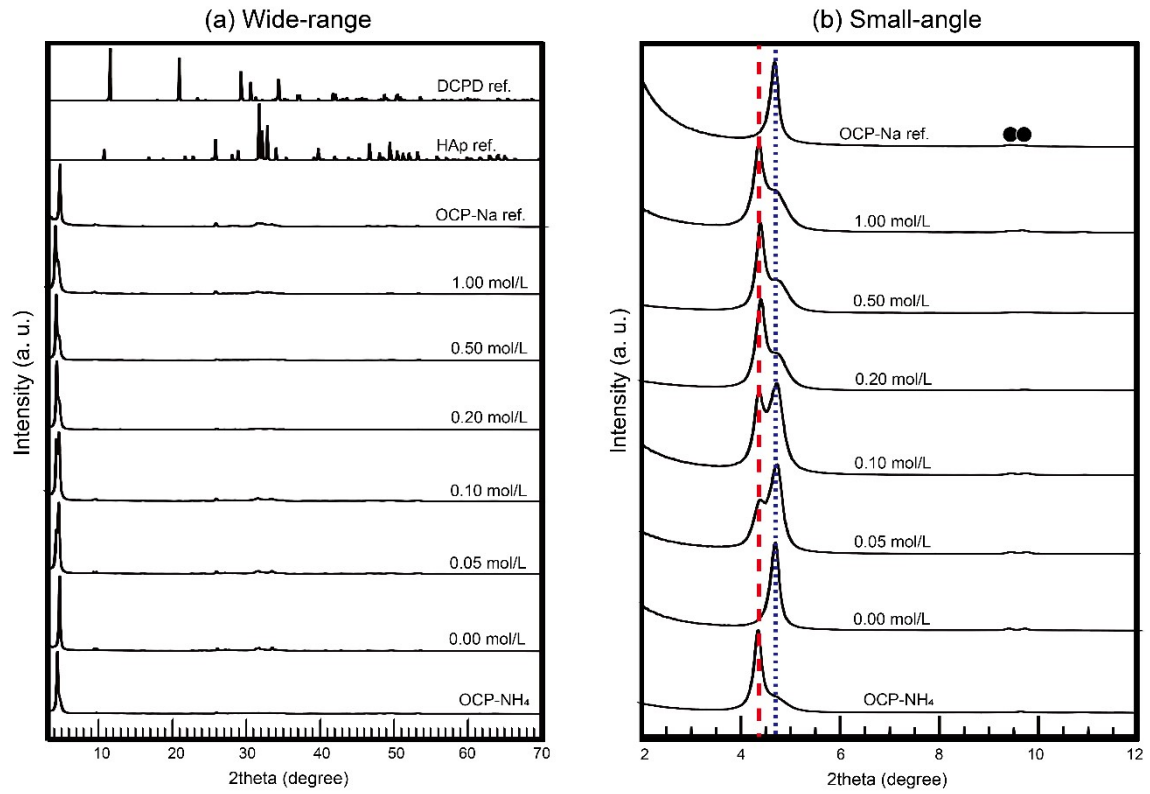

Figure S1. Wide-range (a) and small-angle (b) XRD patterns of treated samples in different  $(\text{NH}_4)_2\text{HPO}_4$  solutions. ●: OCP, blue dot line: conventional OCP d(100) and, red broken line: OCP-NH<sub>4</sub> d(100)'.
